# Supplementary material for: Identification and Aggressiveness of Fusarium Species Associated with Onion Bulb (Allium cepa L.) during Storage
Source: MDPI journal article supplement (doi:10.3390/jof10020161), 2024-02-19
Supplement: s1 [file s1]

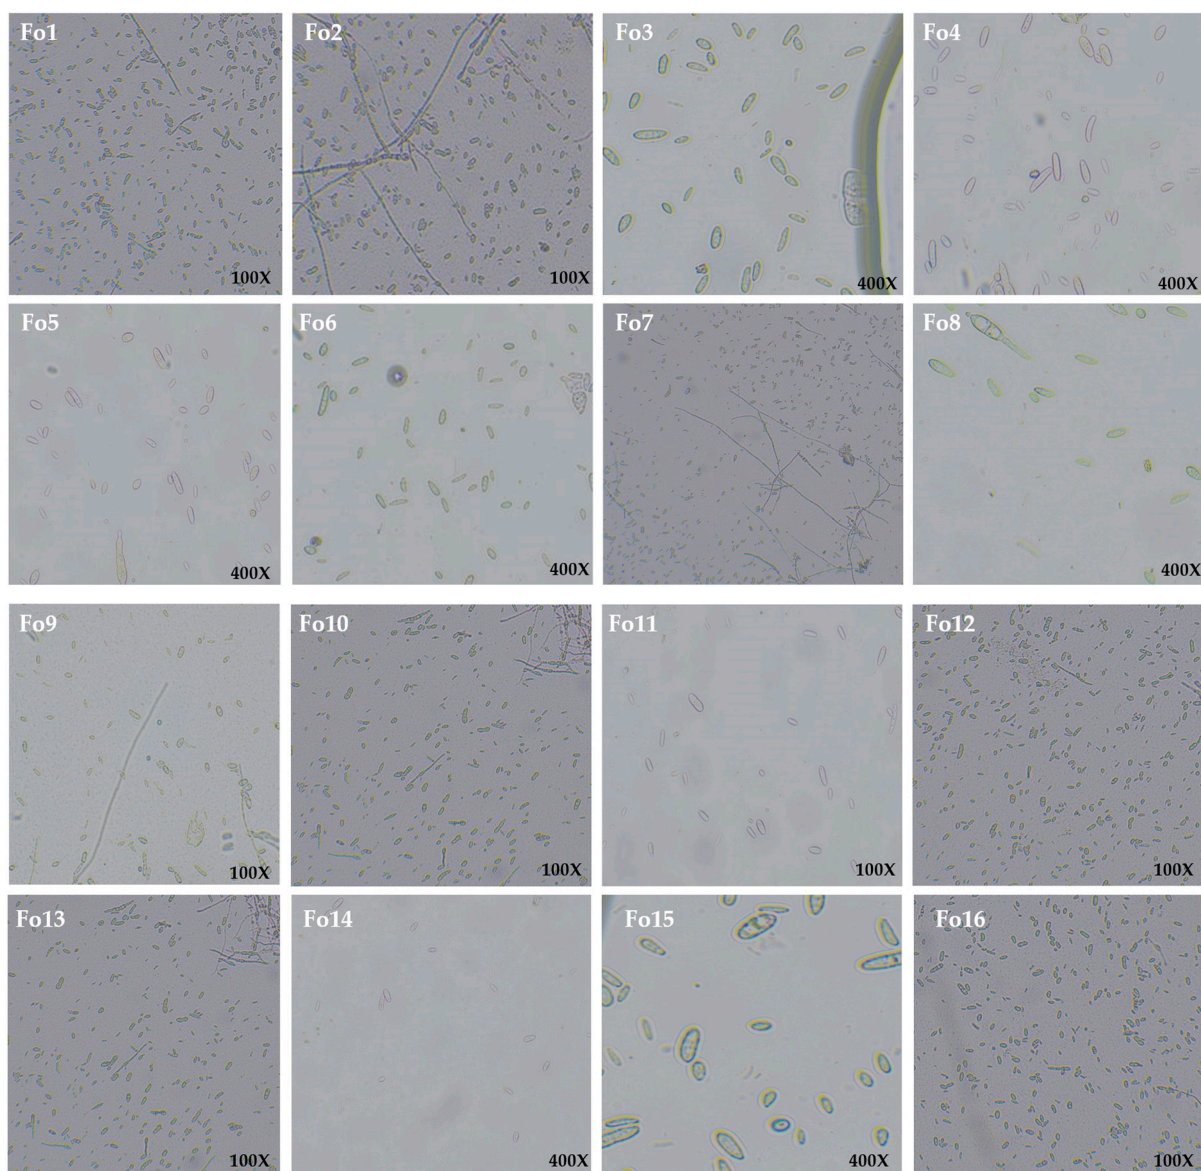

**Figure S1.** Microscopic fungal spores' visualization under light microscopy.

## Sequence data for the *tef-1 $\alpha$* gene partial from 16 *Fusarium* strains isolated from onion bulb (*Allium cepa* L.)

### >*Fusarium* isolate Fo1

TTTCTTCGATCGCGCGTCCTTTGCCCATCGATTTCCCCTACGACTCGAAACGTGCCCCGCTACCCCGCTCGAGACCAA  
AAATTTTGCAATATGATCGTAATTTTTTTGGTGGGGCACTTACCCCGCCACTTGAGCGACGGGAGCGTTTGCCCTCTT  
AACCATTCTCACAACCTCAATGAGTGCGTCGTACGTGTCAAGCAGTCACTAACCATTCAACAATAGGAAGCCGCT  
GAGCTCGGTAAGGGTGCTTCAAGTAAAA

### >*Fusarium* isolate Fo2

ATACTTCTCGATCGCGCGTCCTCTGCCCACCGATCCATCACCCGAATCCGTCTCACGACGACTGAATATGCGCCTGT  
ACCCCGCTCGAGTACAAAATTTTGGGTTCAATCGTAATTTTTTGGTGGCGCTTCTACCCCGCTACTCGAGTGACAG  
GTGTTTGCCCTTTCCACAAAATCATTTGCGCATCACGTGTCAAACAGTCACTAACCACCCGACAATAGGAAGCC  
GCCGAGCTCGGTAAGGGTC

### >*Fusarium* isolate Fo3

ATCATTGATCGCGCGTCCTCTGCCCACCGATTTCACTTGCGATTGAAACGTGCCTGCTACCCCGCTCGAGACCAA  
AAATTTTGCGATATGACCGTAATTTTTTTGGTGGGGCACTTACCCCGCCACTCGAGCGATGGGCGCGTTTTTGCCCTT  
TCCTGTCCACAACCTCAATGAGCGCATTGTACGTGTCAAGCAGCGACTAACCATTGACAATAGGAAGCCGCTG  
AGCTCGGTAAGGGTTCCTTCAAGTAAAA

### >*Fusarium* isolate Fo4

TTCAATTCGATCGCGCGTCCTCTGCCCACCGATTTCACTTGCGATTGAAACGTGCCTGCTACCCCGCTCGAGACCAA  
AAATTTTGCGATATGACCGTAATTTTTTTGGTGGGGCACTTACCCCGCCACTCGAGCGATGGGCGCGTTTTTGCCCTT  
TCCTGTCCACAACCTCAATGAGCGCATTGTACGTGTCAAGCAACGACTAACCATTGACAATAGGAAGCCGCTG  
AGCTCGGTAAGGGTCCCTTCAAGTAA

### >*Fusarium* isolate Fo5

TTATTCGATCGCGCGTCCTCTGCCCACCGATTTCACTTGCGATTGAAACGTGCCTGCTACCCCGCTCGAGACCAAA  
AATTTTGCGATATGACCGTAATTTTTTTGGTGGGGCACTTACCCCGCCACTCGAGCGATGGGCGCGTTTTTGCCCTTT  
CCTGTCCACAACCTCAATGAGCGCATTGTACGTGTCAAGCAACGACTAACCATTGACAATAGGAAGCCGCTGA  
GCTCGGTAAGGGTCCCTTCAAGTAAAA

### >*Fusarium* isolate Fo6

TTTCATCGATCGCGCGTCCTCTGCCCACCGATTTCACTTGCGATTGAAACGTGCCTGCTACCCCGCTCGAGACCAA  
AAATTTTGCGATATGACCGTAATTTTTTTGGTGGGGCACTTACCCCGCCACTCGAGCGATGGGCGCGTTTTTGCCCTT  
TCCTGTCCACAACCTCAATGAGCGCATTGTACGTGTCAAGCAGCGACTAACCATTGACAATAGGAAGCCGCTG  
AGCTCGGTAAGGGTCCCTTCAAGTAA

### >*Fusarium* isolate Fo7

TTTCTTCGATCGCGCGTCCTCTGCCCACCGATTTCACTTGCGATTGAAACGTGCCTGCTACCCCGCTCGAGACCAA  
AAATTTTGCGATATGACCGTAATTTTTTTGGTGGGGCACTTACCCCGCCACTCGAGCGATGGGCGCGTTTTTGCCCTT  
TCCTGTCCACAACCTCAATGAGCGCATTGTACGTGTCAAGCAGCGACTAACCATTGACAATAGGAAGCCGCTG  
AGCTCGGTAAGTTCCTTCAAGTAAAAA

### >*Fusarium* isolate Fo8

TTCTTCGATCGCGCGTCCTCTGCCCACCGATTTCACTTGCGATTGAAACGTGCCTGCTACCCCGCTCGAGACCAAA  
AATTTTGCGATATGACCGTAATTTTTTTGGTGGGGCACTTACCCCGCCACTCGAGCGATGGGCGCGTTTTTGCCCTTT  
CCTGTCCACAACCTCAATGAGCGCATTGTACGTGTCAAGCAGCGACTAACCATTGACAATAGGAAGCCGCTGA  
GCTCGGTAAGGGCCCTTCAAGTAAGA

### >*Fusarium* isolate Fo9

TTCTTCGATCGCGCGTCCTCTGCCCACCGATTTCACTTGCGATTGAAACGTGCCTGCTACCCCGCTCGAGACCAAA  
AATTTTGCGATATGACCGTAATTTTTTTGGTGGGGCACTTACCCCGCCACTCGAGCGATGGGCGCGTTTTTGCCCTTT  
CCTGTCCACAACCTCAATGAGCGCATTGTACGTGTCAAGCAGCGACTAACCATTGACAATAGGAAGCCGCTGA  
GCTCGGTAAGGTGGATTCAAGTAAAA

>*Fusarium* isolate Fo10

TTCTTCGATCGCGCGTCCTCTGCCCACCGATTTCACCTTGCGATTTCGAAACGTGCCTGCTACCCCGCTCGAGACCAA  
AAATTTTGCGATATGACCGTAATTTTTTTGGTGGGGCATTACCCCGCCACTCGAGCGATGGGCGCGTTTTTGCCCTT  
TCCTGTCCACAACCTCAATGAGCGCATTGTCACGTGTCAAGCAACGACTAACCATTTCGACAATAGGAAGCCGCTG  
AGCTCGGTAAGTTCCATTCAAGTAAA

>*Fusarium* isolate Fo11

TTATTCGATCGCGCGTCCTCTGCCCACCGATTTCACCTTGCGATTTCGAAACGTGCCTGCTACCCCGCTCGAGACCAAA  
AATTTTGCGATATGACCGTAATTTTTTTGGTGGGGCATTACCCCGCCACTCGAGCGATGGGCGCGTTTTTGCCCTT  
CCTGTCCACAACCTCAATGAGCGCATTGTCACGTGTCAAGCAGCGACTAACCATTTCGACAATAGGAAGCCGCTGA  
GCTCGGTAAGGGCCCTTCAAGTAA

>*Fusarium* isolate Fo12

TTCTTCGATCGCGCGTCCTCTGCCCACCGATTTCACCTTGCGATTTCGAAACGTGCCTGCTACCCCGCTCGAGACCAA  
AAATTTTGCGATATGACCGTAATTTTTTTGGTGGGGCATTACCCCGCCACTCGAGCGATGGGCGCGTTTTTGCCCTT  
TCCTGTCCACAACCTCAATGAGCGCATTGTCACGTGTCAAGCAGCGACTAACCATTTCGACAATAGGAAGCCGCTG  
AGCTCGGTAAGGTCAATTCAAGTAAAGT

>*Fusarium* isolate Fo13

TTTCTTCGATCGCGCGTCCTCTGCCCACCGATTTCACCTTGCGATTTCGAAACGTGCCTGCTACCCCGCTCGAGACCAA  
AAATTTTGCGATATGACCGTAATTTTTTTGGTGGGGCATTACCCCGCCACTCGAGCGATGGGCGCGTTTTTGCCCTT  
TCCTGTCCACAACCTCAATGAGCGCATTGTCACGTGTCAAGCAGCGACTAACCATTTCGACAATAGGAAGCCGCTG  
AGCTCGGTAAGGGTCCCTTCAAGTAA

>*Fusarium* isolate Fo14

TTATTCGATCGCGCGTCCTCTGCCCACCGATTTCACCTTGCGATTTCGAAACGTGCCTGCTACCCCGCTCGAGACCAAA  
AATTTTGCGATATGACCGTAATTTTTTTGGTGGGGCATTACCCCGCCACTCGAGCGATGGGCGCGTTTTTGCCCTT  
CCTGTCCACAACCTCAATGAGCGCATTGTCACGTGTCAAGCAGCGACTAACCATTTCGACAATAGGAAGCCGCTGA  
GCTCGGTAAGGGTAACTTCAAGTAA

>*Fusarium* isolate Fo15

TTGTTTCGATCGCGCGTCCTCTGCCCACCGATTTCACCTTGCGATTTCGAAACGTGCCTGCTACCCCGCTCGAGACCAA  
AAATTTTGCGATATGACCGTAATTTTTTTGGTGGGGCATTACCCCGCCACTCGAGCGATGGGCGCGTTTTTGCCCTT  
TCCTGTCCACAACCTCAATGAGCGCATTGTCACGTGTCAAGCAGCGACTAACCATTTCGACAATAGGAAGCCGCTG  
AGCTCGGTAAGGGTCCCTTCAAGTAA

>*Fusarium* isolate Fo16

CTTTGATCGCGCGTCCTCTGCCCCGATTTCACCTTGCGATTTCGAAACGTGCCTGCTACCCCGCTCGAGACCAAAAAT  
TTTGCGATATGACCGTAATTTTTTTGGTGGGGCATTACCCCGCCACTCGAGCGATGGGCGCGTTTTTGCCCTTTCCT  
GTCCACAACCTCAATGAGCGCATTGTCACGTGTCAAGCAGCGACTAACCATTTCGACAATAGGAAGCCGCTGAGCT  
CGGTAAGGGTTCCTTCAAGTAA
